# Supplementary material for: A sedimentation study of graphene oxide in aqueous solution using gradient differential centrifugation
Source: Royal Society of Chemistry journal article supplement (doi:10.1039/c6cp00167j), 2016-01-01
Supplement: c6cp00167j1.pdf [file c6cp00167j1.pdf]

## Supporting Information

### A Sedimentation Study of Graphene Oxide in Aqueous Solution Based on Gradient Differential Centrifugation

Jing-Jing Huang and Yong J Yuan\*

Laboratory of Biosensing and MicroMechatronics, School of Materials Science and Engineering, Southwest Jiaotong University, Chengdu, Sichuan 610031, People's Republic of China

\*Corresponding author: E-mail: [yongyuan@swjtu.edu.cn](mailto:yongyuan@swjtu.edu.cn)

#### 1. Weight calculation of graphene oxide

When given the length of carbon bond ( $l = 0.142 \text{ nm}$ ) of one hexagonal carbon unit (HCU) of GO, the particle size of GO sheets ( $L$ , treated as square) and the layer number ( $N$ ), the number of HCU ( $N_H$ ) can be calculated as:

$$N_H = \frac{2\sqrt{3}NL^2}{9l^2}$$

However, the GO plane may not be smooth but corrugated<sup>1,2</sup>. Because of denser distribution of HCU as the result of corrugation, the calculated number of HCU is supposed to be larger. In this case, the  $sp^3$  structure of carbon atom tends to shorten the stretching of HCU in a given direction. Taking this corrugation feature into consideration, the number of HCU can be approximately enlarges by  $\sqrt{3}$  times. It is easy to know that all carbon atoms are calculated three times if we simply count  $6 \times N_H^*$  as total number of carbon atom. The modified number of HCU  $N_H^*$  and mass of single one HCU  $M_H$  thus can be derived as:

$$N_H^* = \sqrt{3}N_H, M_H = 6 \times \frac{1}{3} \times m_C$$

Where  $m_C$  is the mass of carbon atom. The mass of single-layer GO without oxidation (More accurately, this is graphene because there are no oxygenic functionalities, but in this analysis part we note it as GO without oxidation in order to distinguish it with GO after oxidation) can be calculated as:

$$M_G = M_H \times N_H^*$$

Because of oxidation, the mass of GO sheets will be affected by the decoration of oxygenic functionalities. We assume (1) the contribution of carboxyl and carbonyl to GO hydration and oxidation can be ignored because it is insignificant compared with the effects from hydroxyl and epoxy; (2) the population of hydroxyl, epoxy on the surface and water molecule in the intercalated hydrated layer are equal. The mass of GO will be derived as following:

$$Mass_{GO} = n\sqrt{3}N_H M_H \left(1 + \frac{K_1(m_O + m_H)}{m_C}\right)$$

Where  $K_1$  is the oxygen coefficient;  $m_O$  and  $m_H$  are the mass of oxygen and hydrogen atom;  $n$  is layer number, respectively. Because of assumption (2),  $m_O$  and  $m_H$  have the same coefficient  $K_1$ , which can be related to the normalized value of ROD in our case. The calculated results are show in Table S1

Table S1. Calculated results for GO sheets.

| GO sheets       | GO groups  | Size(nm) | Area( $m^2$ ) | $N_H^*$     | $M_G(\text{kg})$ | $Mass_{GO}$ |
|-----------------|------------|----------|---------------|-------------|------------------|-------------|
| $sS_{d3}'@1000$ | $sS_{d3}'$ | 457      | 2.0885E-13    | 1726253.058 | 6.88E-20         | 6.9337E-18  |
| $sS_{d3}'@4000$ |            | 549      | 3.0140E-13    | 2491246.776 | 9.93011E-20      | 7.3782E-18  |
| $sS_{d3}'@8000$ |            | 807      | 6.5125E-13    | 5382934.934 | 2.14564E-19      | 1.3955E-17  |
| $S_{d2}'@1000$  | $S_{d2}'$  | 627      | 3.9313E-13    | 12997718.71 | 5.18089E-19      | 4.4961E-18  |
| $S_{d2}'@4000$  |            | 1001     | 1.0020E-12    | 8282095.153 | 3.30124E-19      | 9.0966E-18  |
| $sS_{d4}'@1000$ | $sS_{d4}'$ | 1153     | 1.3294E-12    | 10988304.24 | 4.37994E-19      | 1.5829E-17  |
| $sS_{d4}'@4000$ |            | 489      | 2.3912E-13    | 1976467.963 | 7.8782E-20       | 2.8382E-18  |

It can be clearly noticed that even if  $sS_{d3}'@1000$  has larger layer number than  $sS_{d3}'@4000$  and  $sS_{d3}'@8000$ , its mass is still smaller. The mass of  $sS_{d3}'@1000$  and  $sS_{d3}'@4000$  are similar though  $sS_{d3}'@1000$  are relatively thicker. This is because  $sS_{d3}'@8000$  has much larger lateral size compared with  $sS_{d3}'@1000$  and  $sS_{d3}'@4000$ , and less layer number of  $sS_{d3}'@4000$  compared with  $sS_{d3}'@8000$  is compensated by its relatively larger particle size. The GO sheets of larger lateral size has larger gradient compared with GO of smaller particle size, which indicates weight calculation of GO sheets is more affected by lateral size than longitudinal size. Such pattern can also be noticed in  $sS_{d4}'$  and  $S_{d2}'$  groups. Besides, oxidation has no significant influence on this pattern but slightly changes the mass scale. Therefore, when difference in layer number is not that much, it probably can be ignored compared with lateral size shift. In our case, for  $sS_{d3}'$  group,  $sS_{d3}'@8000$  has larger weight than  $sS_{d3}'@1000$  and  $sS_{d3}'@4000$  but still has lower sedimentation rate; for  $S_{d2}'$  group,  $S_{d2}'@4000$  has larger weight than  $S_{d2}'@1000$  but again has lower sediment rate.

1. Zhu, Y. *et al.* Graphene and Graphene Oxide: Synthesis, Properties, and Applications. *Adv. Mater.* **22**, 3906–3924 (2010).
2. Dreyer, D. R., Park, S., Bielawski, C. W. & Ruoff, R. S. The chemistry of graphene oxide. *Chem. Soc. Rev.* **39**, 228–240 (2010).
